# Supplementary material
Source: PubMed Central journal article supplement (PMC5636783)
Supplement: 11357_2017_9988_MOESM1_ESM.pdf [file 11357_2017_9988_MOESM1_ESM.pdf]

## Supplemental Figure 1

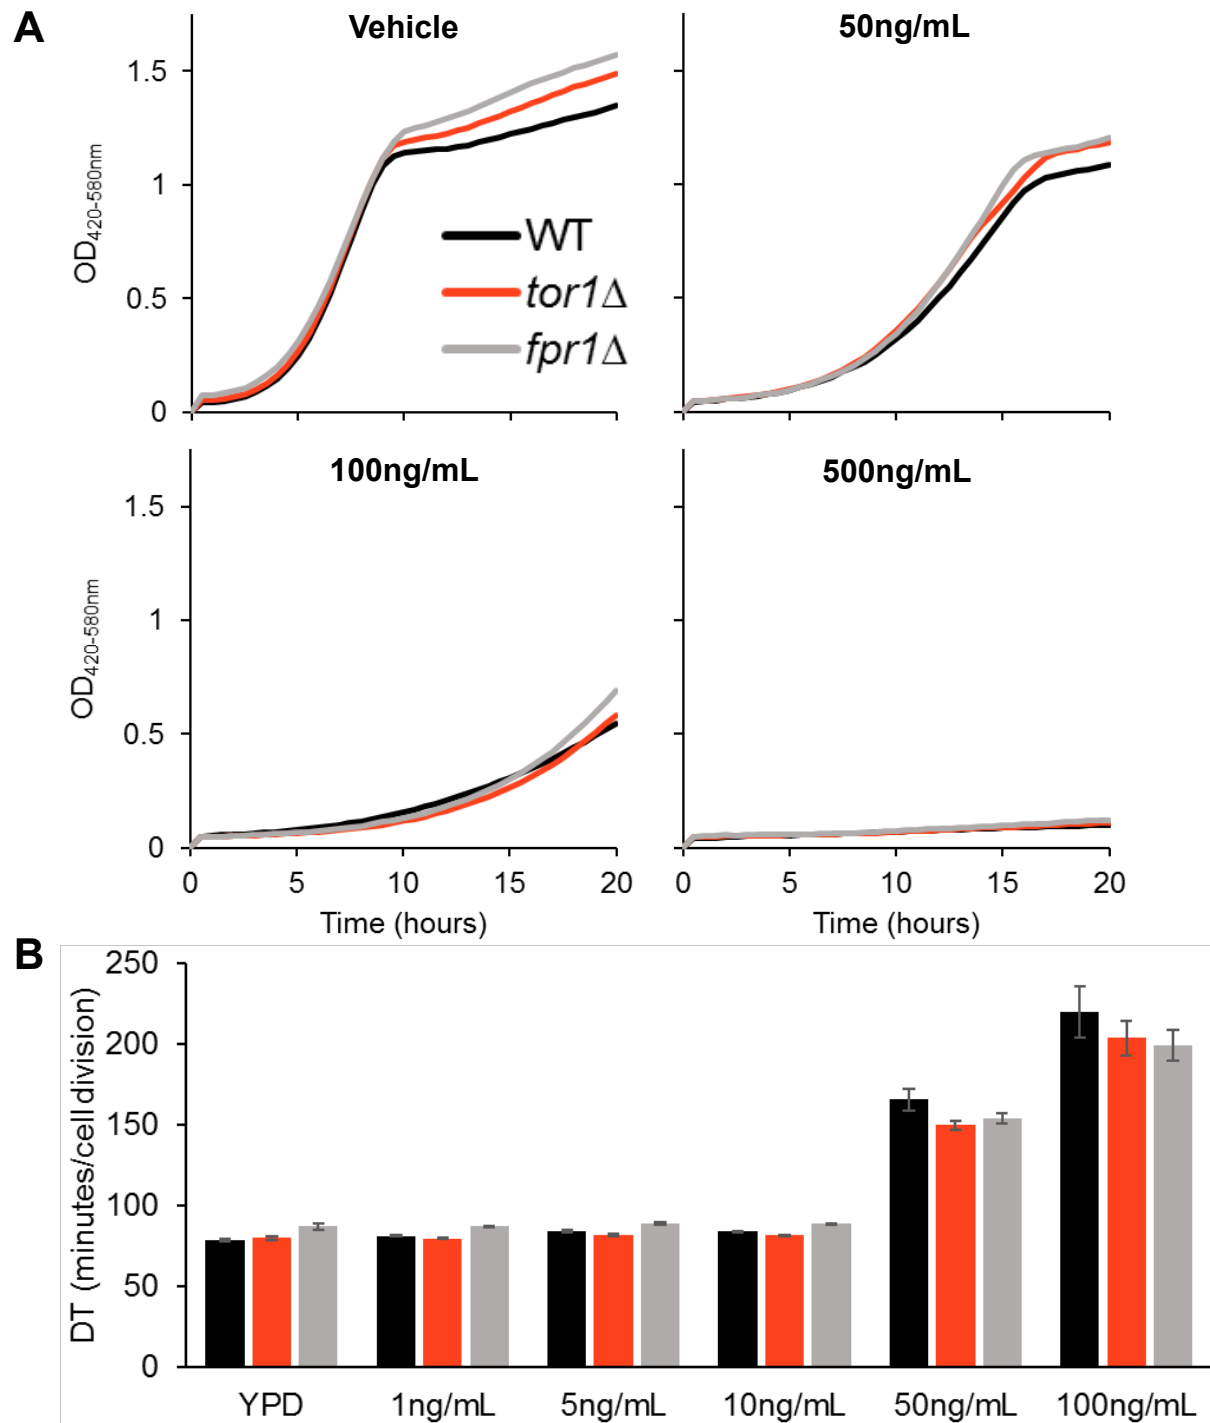

**Supplemental figure 1. Cycloheximide (CHX) is a general growth inhibitor in yeast.** A) WT (black), *tor1Δ* (red), and *fpr1Δ* (gray) grown in YPD with vehicle (top left), 50ng/mL (top right), 100ng/mL (bottom left), and 500ng/mL (bottom right) CHX. B) Peak doubling time (DT) (minutes/cell division) of WT, *tor1Δ*, *fpr1Δ* cells outgrown in the presence of 1-100ng/mL CHX (n=3-5 biological replicate cultures tested for each strain and treatment). \*significantly different from 1.5% DMSO control (p < 0.05, Welch's t-test). Error bars = SEM. 500ng/mL CHX treatment could not be calculated because outgrowing cultures failed to reach OD = 0.3 after 20 hours.
