# Supplementary material
Source: PubMed Central journal article supplement (PMC5636783)
Supplement: 11357_2017_9988_MOESM2_ESM.pdf [file 11357_2017_9988_MOESM2_ESM.pdf]

## Supplemental Figure 2

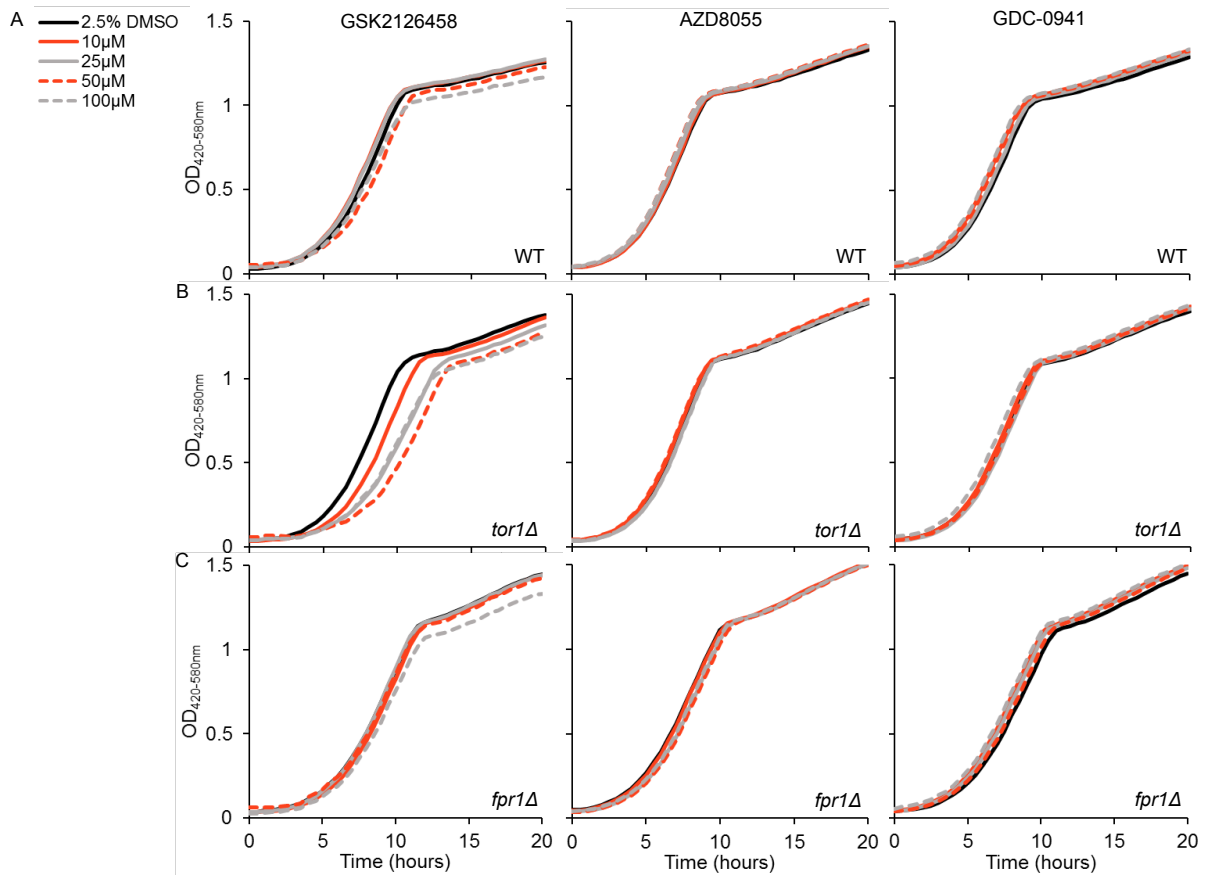

**Supplemental figure 2. Many TOR catalytic inhibitors have limited or no effect on yeast growth.** GSK2126458, but not AZD8055 or GDC-0941, impacts growth of *tor1Δ* mutant yeast. Outgrowth of WT (A), *tor1Δ* (B), and *fpr1Δ* (C) in 2.5% DMSO (vehicle control) or 10-100μM GSK2126458 (left), AZD8055 (middle), or GDC-0941 (right). n=3-5 biological replicate cultures tested for each strain and treatment.
