# Supplementary material
Source: PubMed Central journal article supplement (PMC5636783)
Supplement: 11357_2017_9988_MOESM4_ESM.pdf [file 11357_2017_9988_MOESM4_ESM.pdf]

Supplemental Table 2. Doubling time (DT) (minutes/cell division), standard error of the mean (SEM), percent change, and number of cultures tested (n) for catalytic mTOR inhibitors.

| Treatment        | WT           |          |    | <i>tor1Δ</i> |          |    | <i>fpr1Δ</i> |          |    |
|------------------|--------------|----------|----|--------------|----------|----|--------------|----------|----|
|                  | DT (SEM)     | % change | n  | DT (SEM)     | % change | n  | DT (SEM)     | % change | n  |
| 2.5% DMSO        | 85.9 (0.9)   | -        | 12 | 84.6 (1.0)   | -        | 13 | 96.9 (1.1)   | -        | 12 |
| 10μM AZD8055     | 92.4 (8.4)   | 7.5      | 4  | 93.0 (7.5)   | 9.9      | 4  | 104.4 (10.8) | 7.7      | 4  |
| 25μM AZD8055     | 86.2 (1.4)   | 0.3      | 3  | 87.3 (2.2)   | 3.1      | 3  | 95.7 (1.1)   | -1.2     | 3  |
| 50μM AZD8055     | 87.6 (2.6)   | 1.9      | 3  | 89.5 (2.6)   | 5.8      | 3  | 96.9 (3.2)   | 0.0      | 3  |
| 100μM AZD8055    | 87.7 (3.3)   | 2.1      | 3  | 89.6 (2.3)   | 5.9      | 3  | 98.6 (2.8)   | 1.8      | 3  |
| 10μM GDC-0941    | 85.7 (2.0)   | -0.3     | 3  | 84.2 (2.1)   | -0.5     | 3  | 95.9 (2.4)   | -1.0     | 3  |
| 25μM GDC-0941    | 84.6 (1.6)   | -1.6     | 3  | 82.5 (1.0)   | -2.6     | 3  | 95.2 (1.2)   | -1.7     | 3  |
| 50μM GDC-0941    | 86.8 (2.8)   | 1.0      | 3  | 85.8 (2.1)   | 1.4      | 3  | 96.8 (2.9)   | -0.1     | 3  |
| 100μM GDC-0941   | 94.3 (3.3)   | 9.7      | 3  | 93.1 (2.6)   | 10.0     | 3  | 102.5 (4.4)  | 5.8      | 3  |
| 10μM GSK2126458  | 85.4 (1.5)   | -0.6     | 6  | 92.5 (1.6)   | 9.3*     | 6  | 97.8 (2.9)   | 1.0      | 6  |
| 25μM GSK2126458  | 89.9 (2.5)   | 4.6      | 7  | 105.7 (2.6)  | 24.9*    | 7  | 96.7 (2.3)   | -0.1     | 7  |
| 50μM GSK2126458  | 80.6 (6.3)   | -6.2     | 6  | 93.2 (4.1)   | 10.1     | 6  | 95.6 (1.6)   | -1.3     | 6  |
| 100μM GSK2126458 | 103.8 (5.4)  | 20.8*    | 6  | 117.3 (6.8)  | 38.6*    | 6  | 112.4 (5.3)  | 16.0*    | 6  |
| 1μM Torin 1      | 88.1 (2.0)   | 2.6      | 4  | 88.7 (2.1)   | 4.9      | 4  | 96.2 (2.0)   | -0.7     | 4  |
| 10μM Torin 1     | 122.7 (5.0)  | 42.8*    | 5  | 157.5 (8.6)  | 86.2*    | 5  | 125.5 (8.3)  | 29.6*    | 5  |
| 25μM Torin 1     | 179.9 (11.2) | 109.4*   | 5  | 165.1 (19.1) | 95.1*    | 5  | 158.4 (5.6)  | 63.5*    | 5  |

\*= p < 0.05, compared to 2.5% DMSO, Welch's (unequal variance) t-test.
